# Supplementary material for: Sequential Extraction of Proanthocyanidin Fractions from Ficus Species and Their Effects on Rumen Enzyme Activities In Vitro
Source: Molecules. 2022 Aug 12;27(16):5153. doi: 10.3390/molecules27165153 (PMC9415173; doi:10.3390/molecules27165153)
Supplement: Supplementary file 1 [file molecules-27-05153-s001.zip › molecules-1831411-supplementary.pdf]

## Supplementary figures and tables

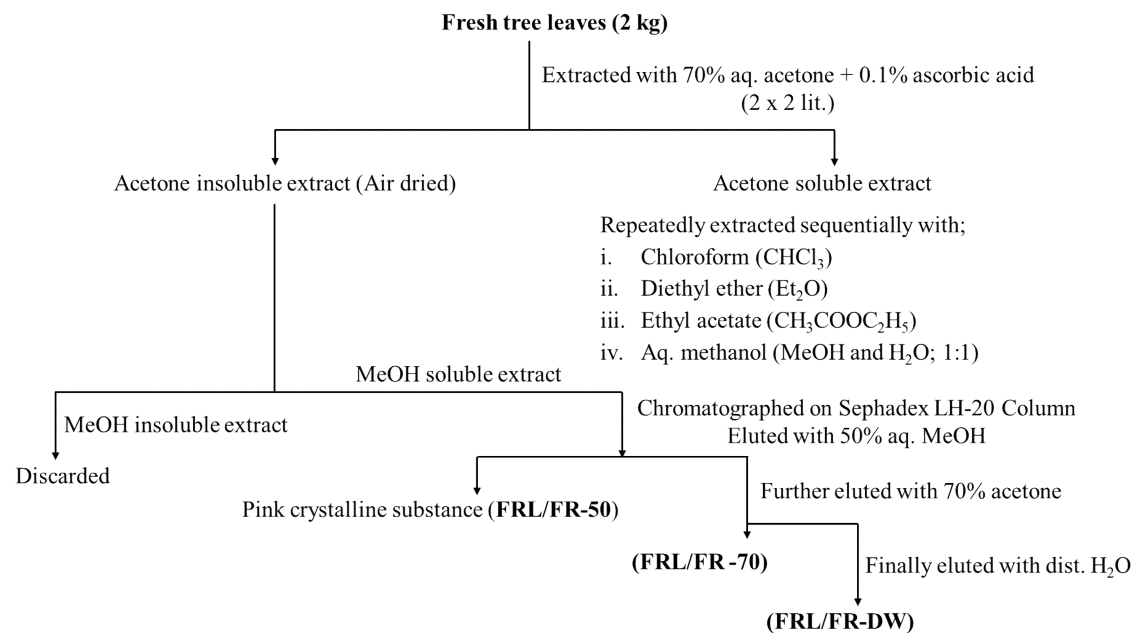

**Figure S1.** Schematic flowchart for extraction and isolation of proanthocyanidins from tree leaves

**Table S1.** Stereochemistry of flavan-3-ols in with hydroxylation pattern and % of extender unit and terminal units in oligomers isolated from tree leaves

| Fractions | (+) Catechin     |                          | (-) Epicatechin  |                          | (+) Gallocatechin |                          | (-) Epigallocatechin |                          | Extender unit (%) | Terminal unit (%) |
|-----------|------------------|--------------------------|------------------|--------------------------|-------------------|--------------------------|----------------------|--------------------------|-------------------|-------------------|
|           | Position of 'OH' | <i>R-S</i> configuration | Position of 'OH' | <i>R-S</i> configuration | Position of 'OH'  | <i>R-S</i> configuration | Position of 'OH'     | <i>R-S</i> configuration |                   |                   |
| FRL-50    | 3,5,7,3'4'       | 2 <i>R</i> : 3 <i>S</i>  | 3,5,7,3'4'       | 2 <i>R</i> : 3 <i>R</i>  | 3,5,7,3'4'5'      | 2 <i>R</i> : 3 <i>S</i>  | 3,5,7,3'4'5'         | 2 <i>R</i> : 3 <i>R</i>  | 76                | 24                |
| FRL-DW    | -                | -                        | 3,5,7,3'4'       | 2 <i>R</i> : 3 <i>R</i>  | 3,5,7,3'4'5'      | 2 <i>R</i> : 3 <i>S</i>  | 3,5,7,3'4'5'         | 2 <i>R</i> : 3 <i>R</i>  | 80                | 20                |
| FR-70     | 3,5,7,3'4'       | 2 <i>R</i> : 3 <i>S</i>  | 3,5,7,3'4'       | 2 <i>R</i> : 3 <i>R</i>  | 3,5,7,3'4'5'      | 2 <i>R</i> : 3 <i>S</i>  | 3,5,7,3'4'5'         | 2 <i>R</i> : 3 <i>R</i>  | 84                | 16                |
| FR-50     | -                | -                        | 3,5,7,3'4'       | 2 <i>R</i> : 3 <i>R</i>  | 3,5,7,3'4'5'      | 2 <i>R</i> : 3 <i>S</i>  | 3,5,7,3'4'5'         | 2 <i>R</i> : 3 <i>R</i>  | 78                | 22                |
| FR-DW     | 3,5,7,3'4'       | 2 <i>R</i> : 3 <i>S</i>  | 3,5,7,3'4'       | 2 <i>R</i> : 3 <i>R</i>  | 3,5,7,3'4'5'      | 2 <i>R</i> : 3 <i>S</i>  | 3,5,7,3'4'5'         | 2 <i>R</i> : 3 <i>R</i>  | 68                | 32                |

FRL-50: Extract eluted at 50% of methanol from *Ficus religiosa*, FRL-DW: Extract eluted with distilled water from *F. religiosa*, FR-70: Extract eluted at 70% of acetone from *F. racemosa*, FR-50: Extract eluted at 50% of methanol from *F. racemosa*, FR-DW: Extract eluted with distilled water from *F. racemosa*.

*R-S* configuration: It is used to differentiate between two enantiomers of a chiral molecule.
